# Supplementary material for: Impacts of summertime photochemical aging on the physicochemical properties of aerosols in a Paris suburban forest region
Source: Copernicus journal article supplement (doi:10.5194/egusphere-2025-2667), 2025-07-07
Supplement: Supplementary file 1 [file egusphere-2025-2667-supplement.pdf]

**S1 Air mass history examples from UK NAME dispersion model**

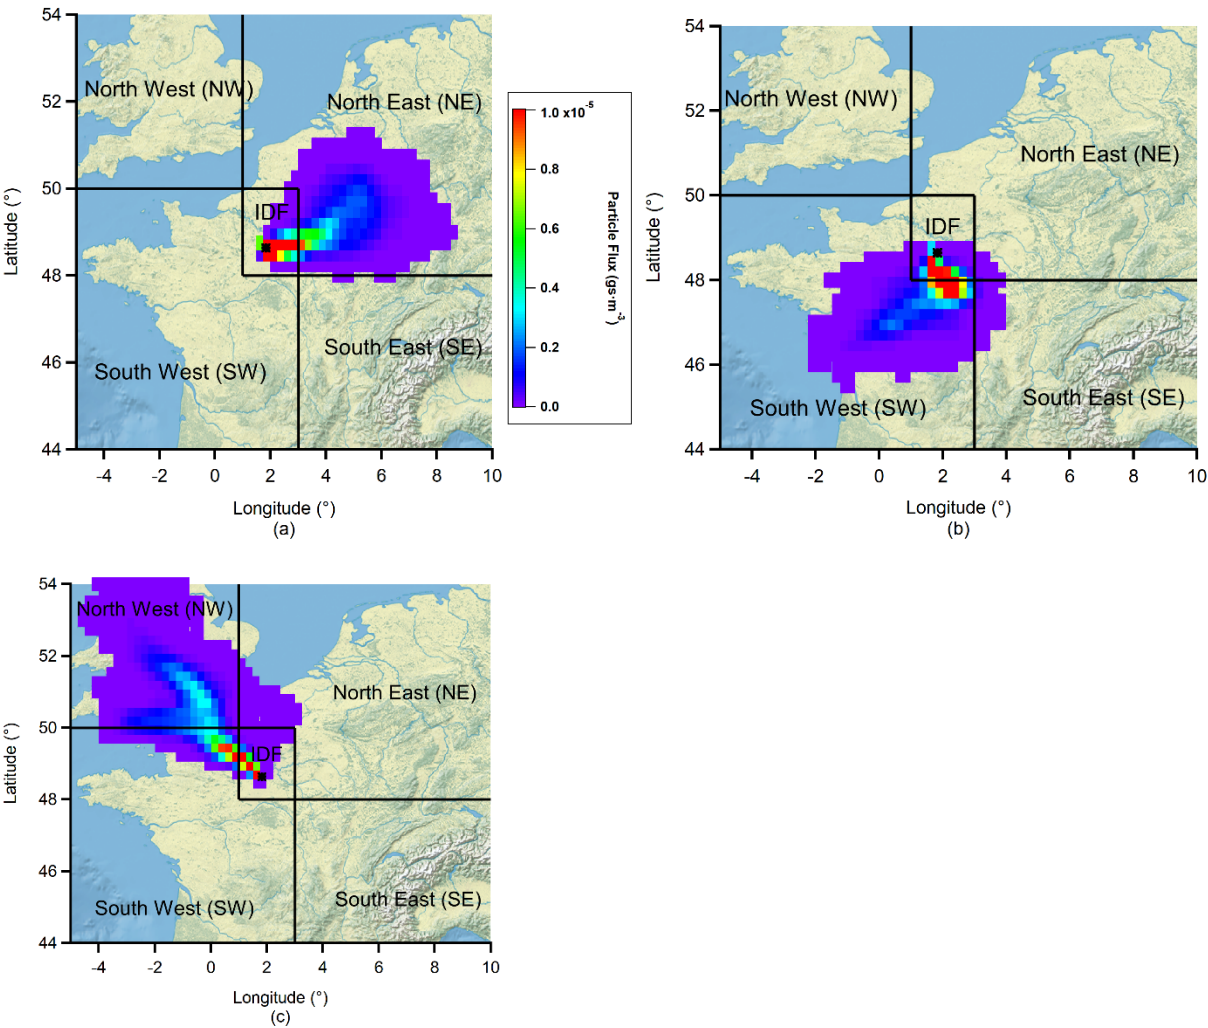

5 **Figure S1: Examples of different external air mass sources dominated periods: (a) Northeast (NE) airmass-dominated period (12:00 UTC 11/07/2022); (b) Southwest (SW) airmass-dominated period (12:00 UTC 01/07/2022); and (c) Northwest (NW) airmass-dominated period (12:00 UTC 05/07/2022).**

S2 Spatial distribution of fire points

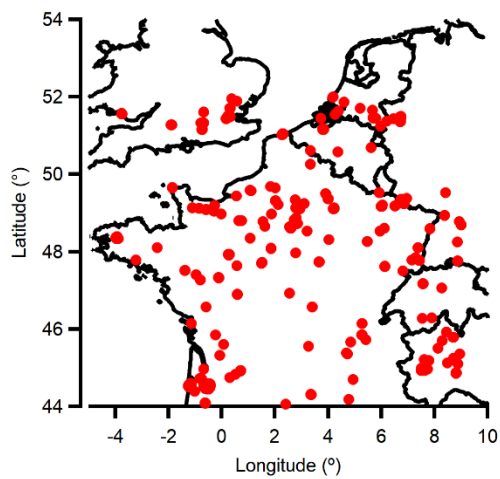

10 **Figure S2: Spatial distribution of fire points during the ACROSS project period observed by MODIS.**

### S3 Positive Matrix Factory analysis from HR-AMS

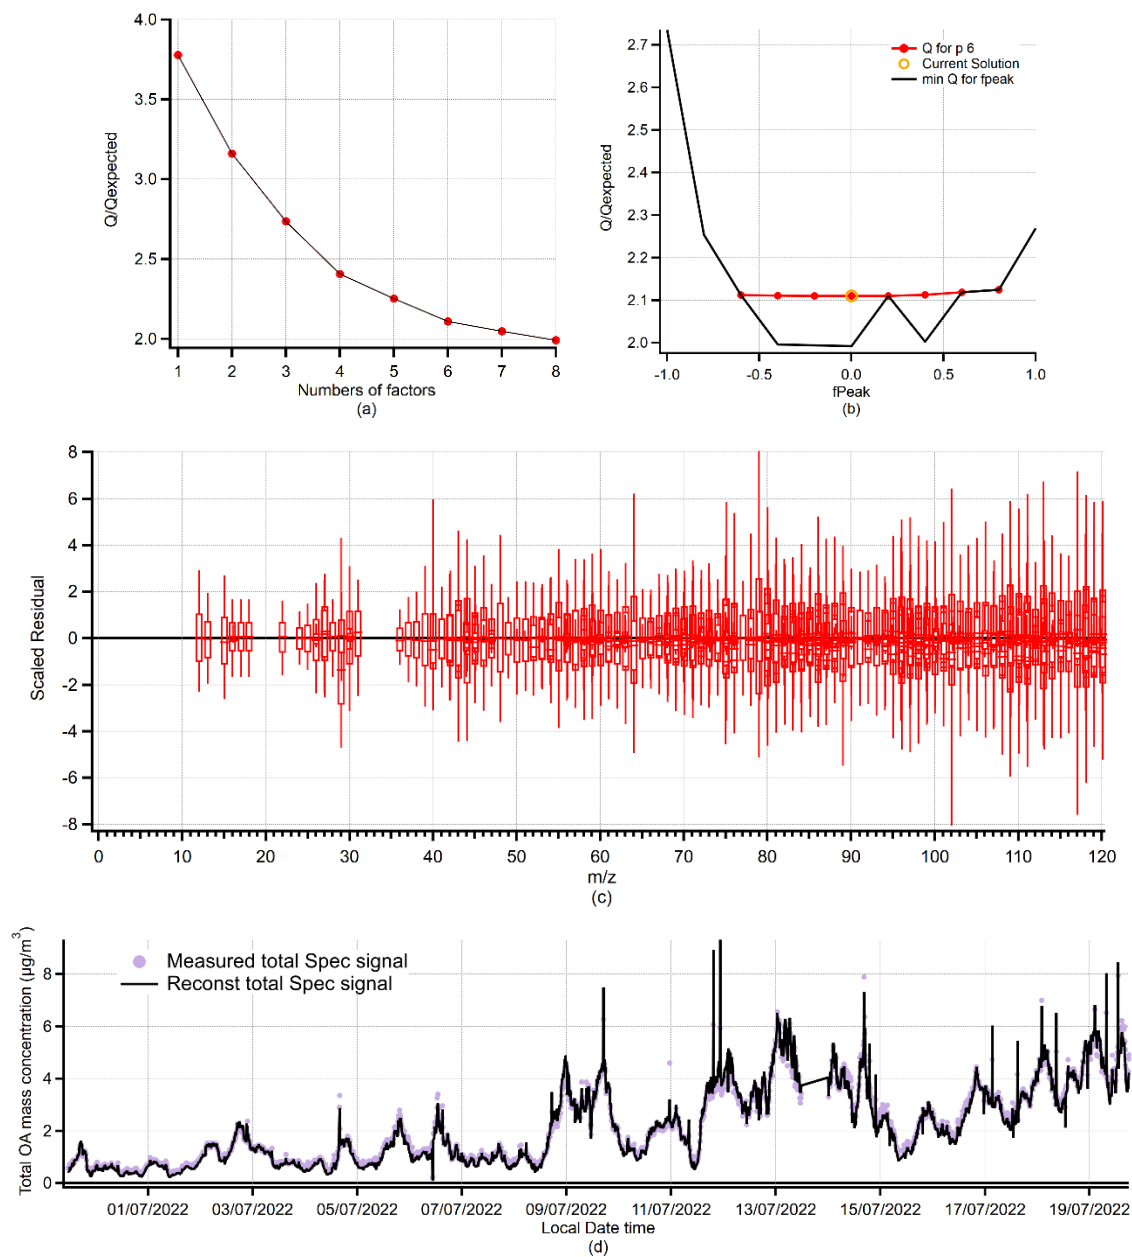

**Figure S3: PMF diagnostic plots: (a) Quality-of-fit parameter  $Q/Q_{\text{expected}}$  varied as a function of the number of factors, (b)  $Q/Q_{\text{expected}}$  varied as a function of  $f_{\text{peak}}$ , (c) scaled residual for each  $m/z$ , (d) time series of measured and PMF reconstructed OA mass concentrations.**

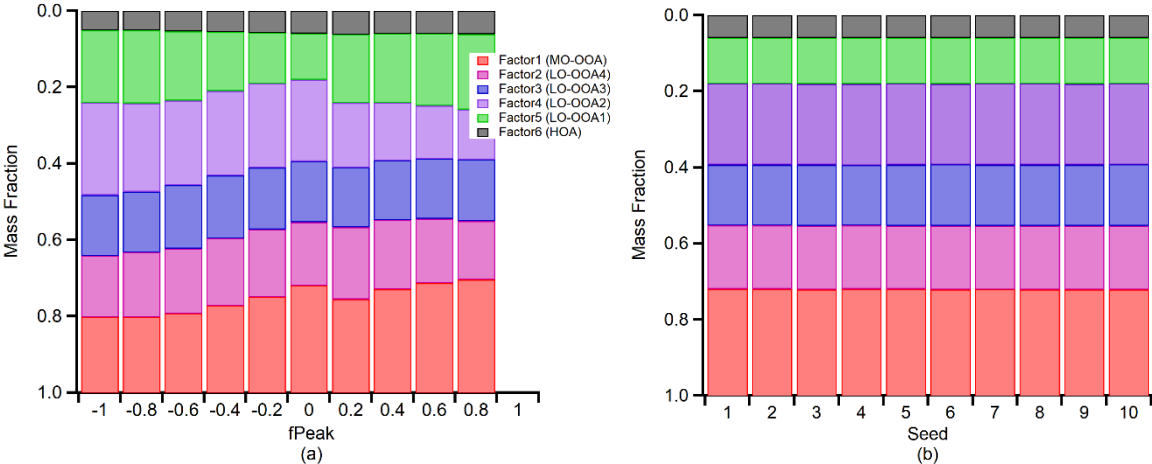

Figure S4: Mass fraction of PMF factors for six-factor solution as a function of (a) fPeak, (b) Seed.

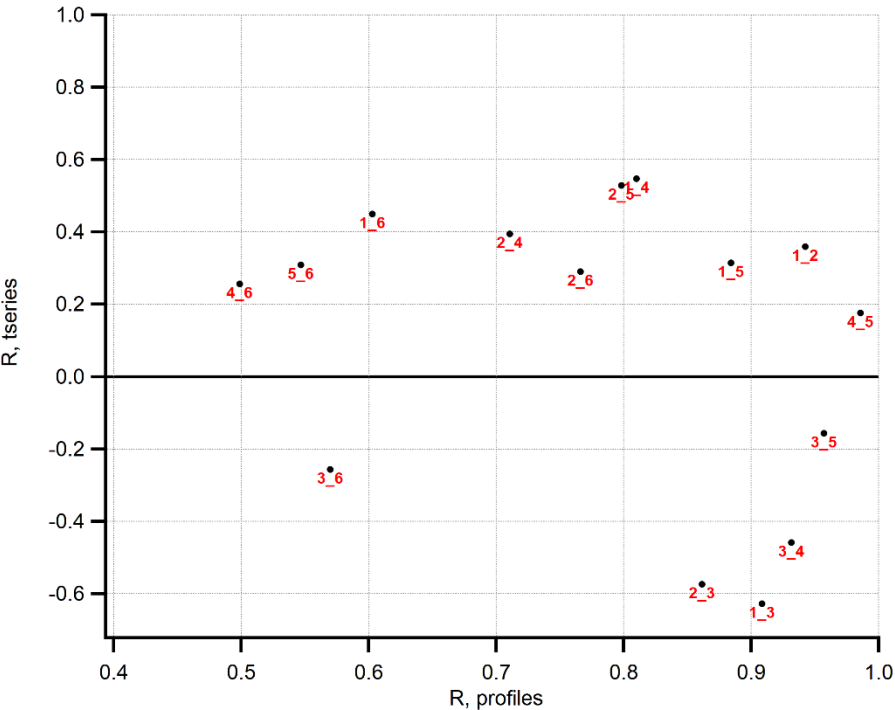

Figure S5: Correlations of the time series and spectral profiles among the PMF factors. The factor numbers refer to: (1) MO-OOA; (2) LO-OOA4; (3) LO-OOA3; (4) LO-OOA2; (5) LO-OOA1; (6) HOA

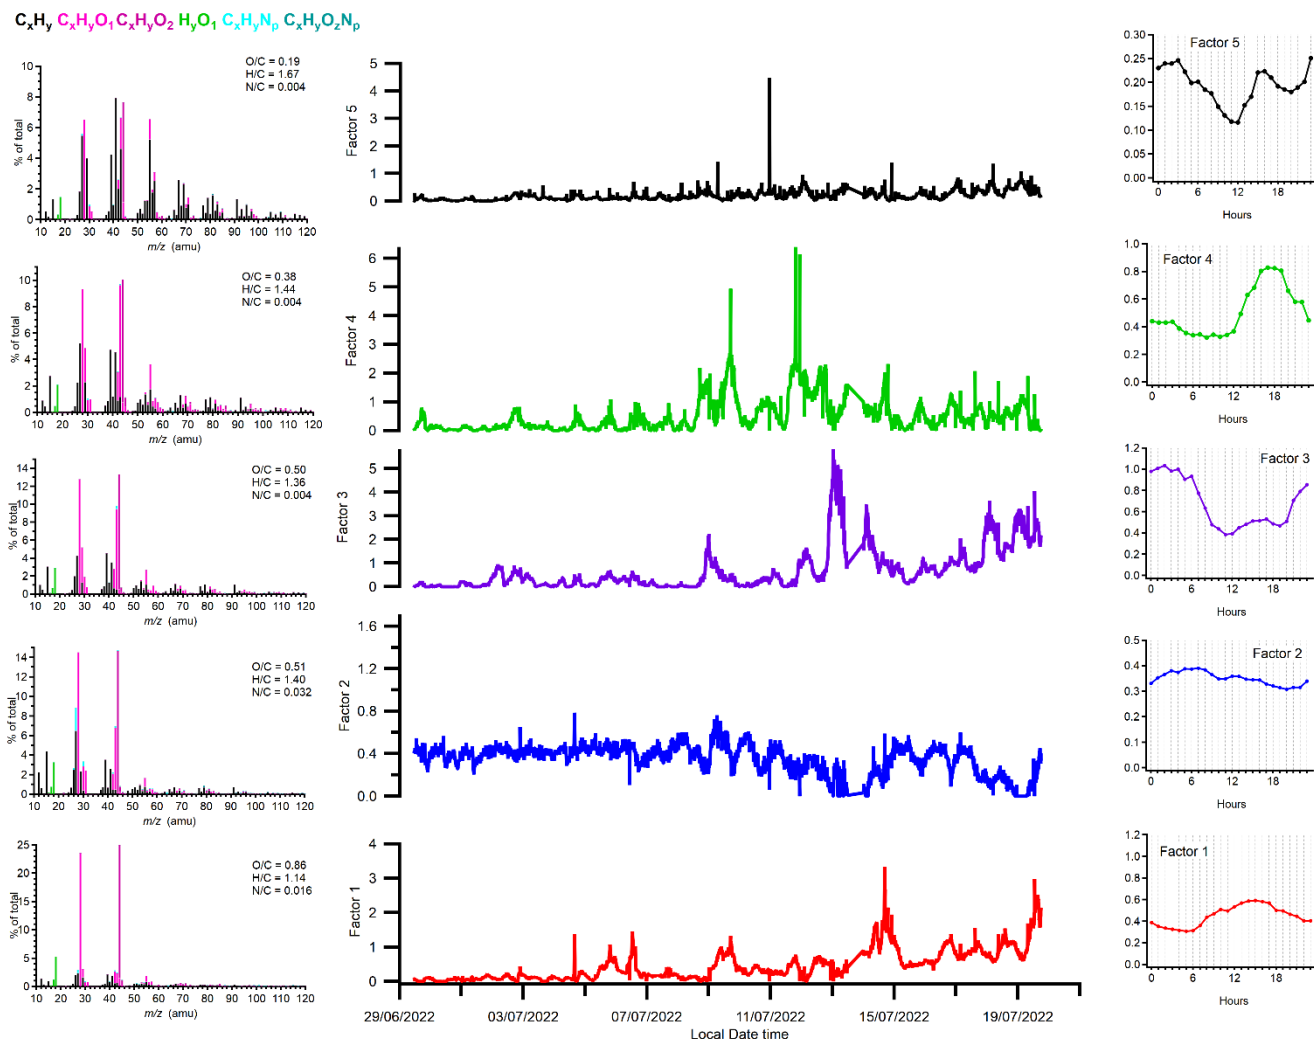

**Figure S6: The average mass spectra and time series for 5-factor solution. Factor 4 is a mixed factor of LO-OOA1 and LO-OOA4.**

**The HOA factor is not distinctly resolved in the 5-factor solution because Factor 5 represents a mixture of HOA and secondary compounds. This is evidenced by its afternoon concentration peak which is similar to the other OOA factors.**

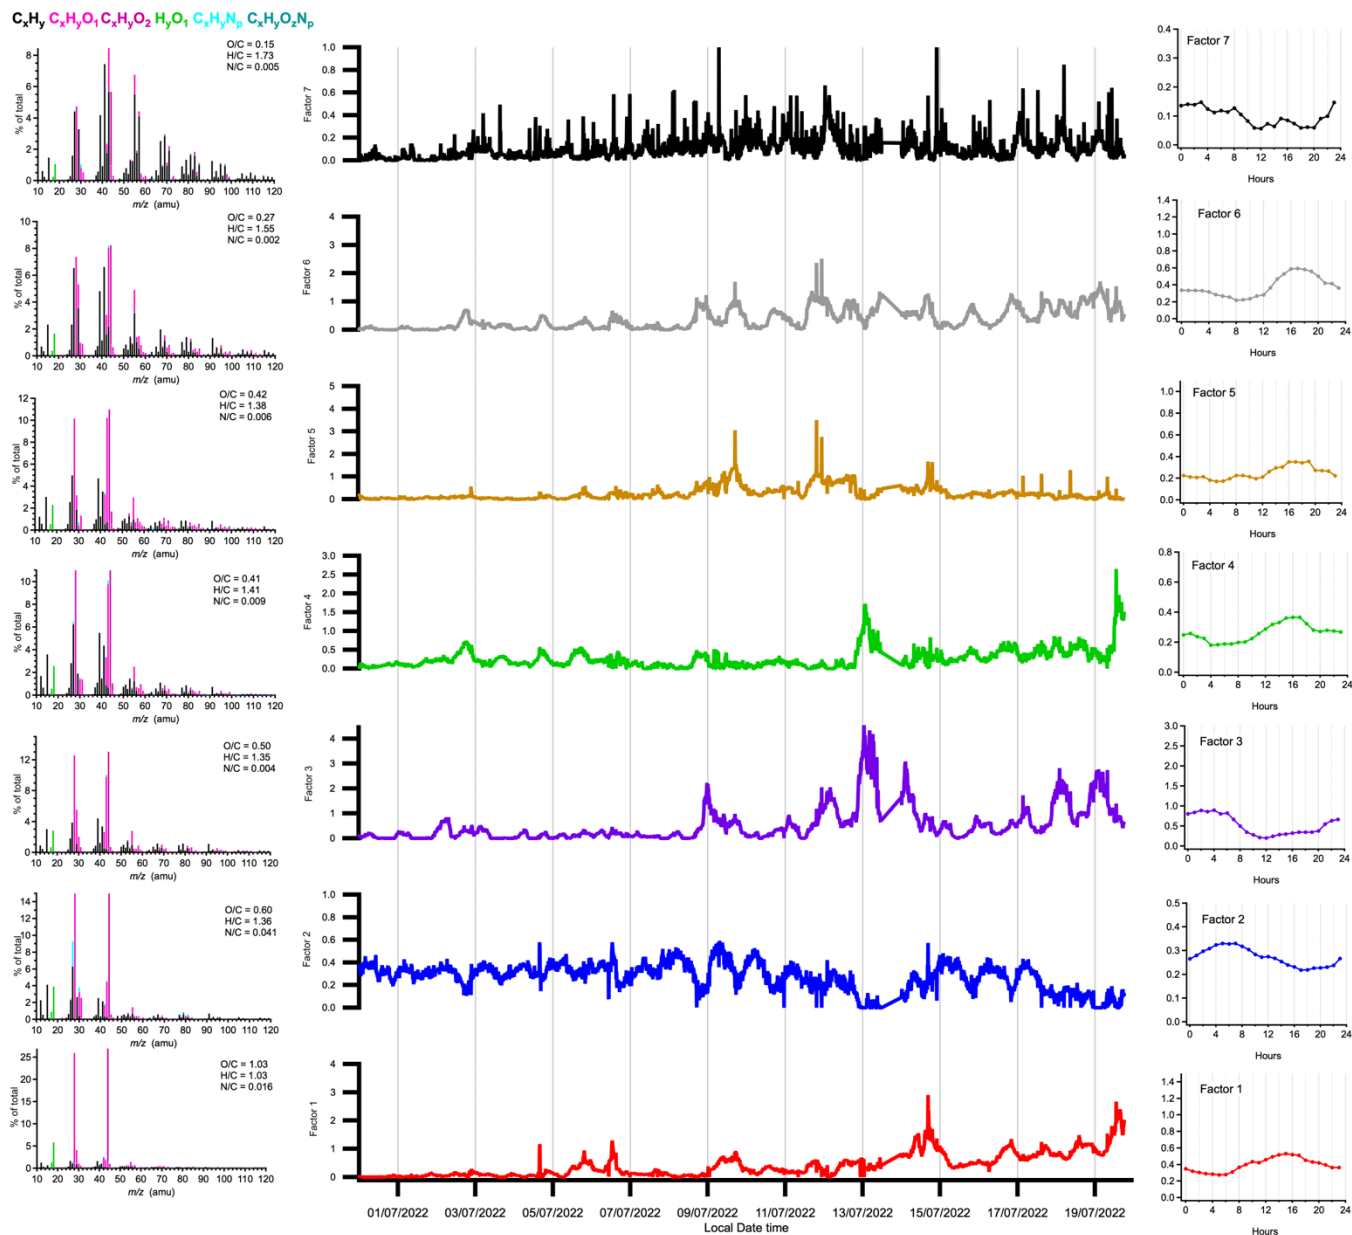

**Figure S7: The average mass spectra and time series for 7-factor solution. The LO-OOA1 splits into two factors (Factor 3 and Factor 5). The 7-factor solution exhibited greater rotational ambiguity, as indicated by significant variation in factor mass fractions across the fPeak range (-1 to 1).**

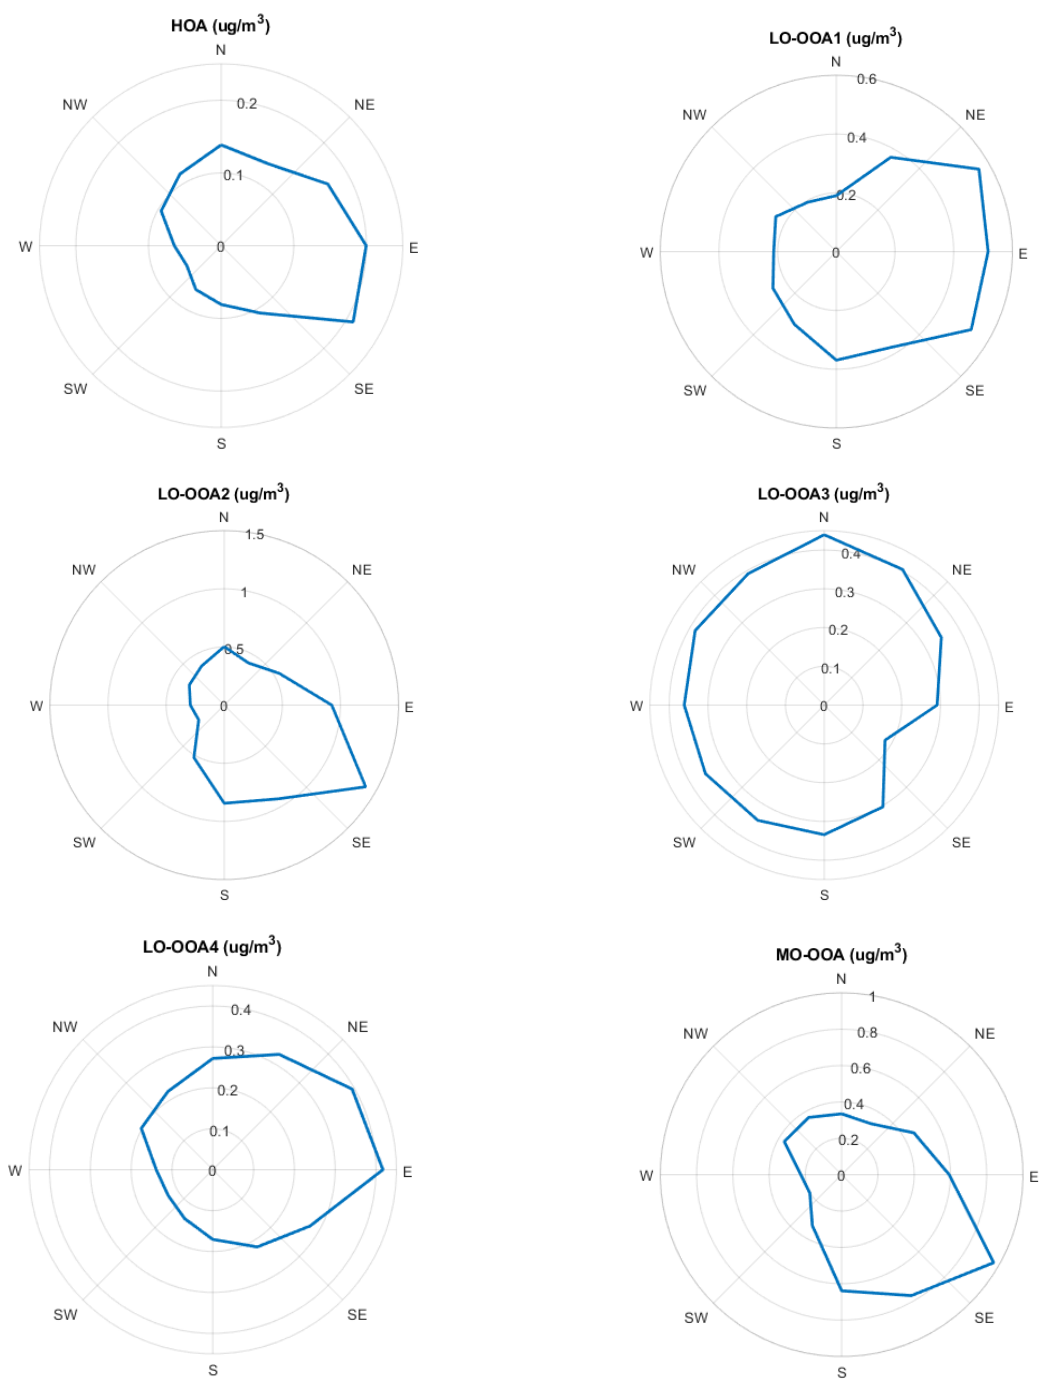

Figure S8: Wind rose for the PMF factors.

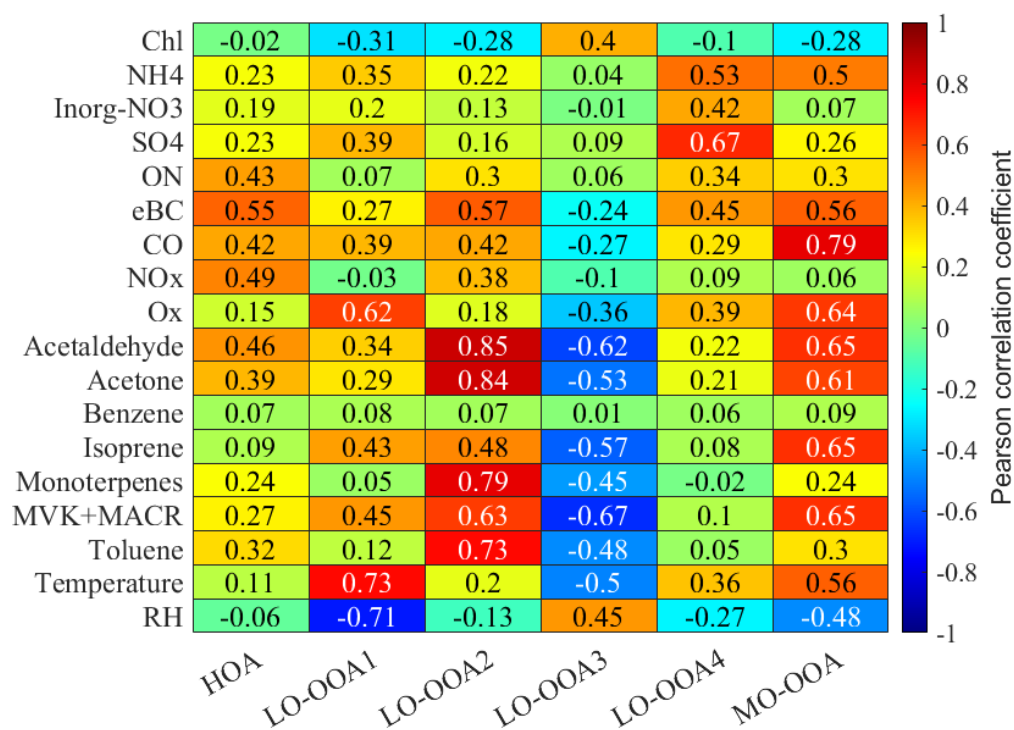

**Figure S9: Person correlation coefficient (r) between the AMS PMF factors and the external tracers**



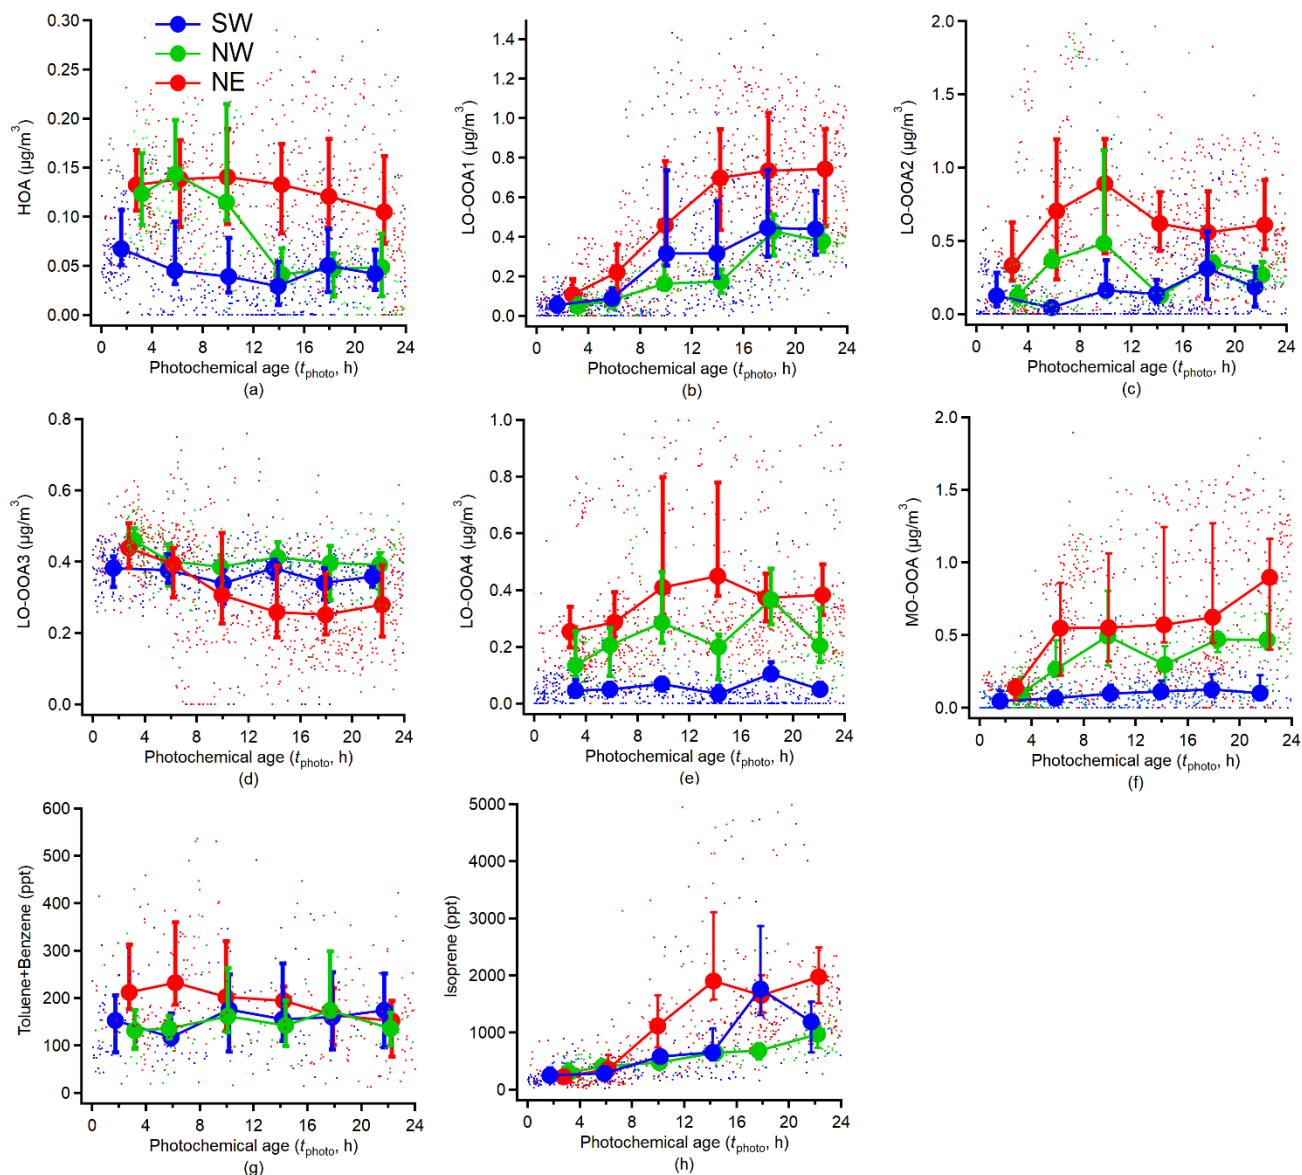

50 **Figure S10: Variations in (a-g) HR-AMS PMF-derived factors concentrations; (h) Sum of Toluene and Benzene concentration; (i) isoprene concentration as a function of photochemical age. The error bar indicates the 25th and 75th percentiles, respectively.**

| Normalised<br>Parameters | Southwest (SW) period                                                          | Northwest (NW) period                                                           | Northeast (NE) period                                                           |
|--------------------------|--------------------------------------------------------------------------------|---------------------------------------------------------------------------------|---------------------------------------------------------------------------------|
| PM <sub>1</sub>          | $y = 23 \cdot \exp(0.038(\pm 0.005) \cdot t_{\text{photo}})$<br>$R^2 = 0.97$   | $y = 25.41 \cdot \exp(0.025(\pm 0.003) \cdot t_{\text{photo}})$<br>$R^2 = 0.97$ | $y = 27.7 \cdot \exp(0.029(\pm 0.007) \cdot t_{\text{photo}})$<br>$R^2 = 0.91$  |
| Total OA                 | $y = 12.8 \cdot \exp(0.050(\pm 0.005) \cdot t_{\text{photo}})$<br>$R^2 = 0.98$ | $y = 15.12 \cdot \exp(0.035(\pm 0.003) \cdot t_{\text{photo}})$<br>$R^2 = 0.99$ | $y = 18.56 \cdot \exp(0.037(\pm 0.011) \cdot t_{\text{photo}})$<br>$R^2 = 0.87$ |
| HOA                      | -                                                                              | $y = 1.61 \cdot \exp(-0.068(\pm 0.017) \cdot t_{\text{photo}})$<br>$R^2 = 0.91$ | -                                                                               |
| LO-OOA1                  | $y = 0.91 \cdot \exp(0.080(\pm 0.02) \cdot t_{\text{photo}})$<br>$R^2 = 0.93$  | $y = 0.59 \cdot \exp(0.081(\pm 0.02) \cdot t_{\text{photo}})$<br>$R^2 = 0.92$   | $y = 1.62 \cdot \exp(0.066(\pm 0.03) \cdot t_{\text{photo}})$<br>$R^2 = 0.76$   |
| LO-OOA2                  | $y = 0.97 \cdot \exp(0.053(\pm 0.027) \cdot t_{\text{photo}})$<br>$R^2 = 0.69$ | $y = 1.26 \cdot \exp(0.043(\pm 0.02) \cdot t_{\text{photo}})$<br>$R^2 = 0.72$   | $y = 2.91 \cdot \exp(0.026(\pm 0.005) \cdot t_{\text{photo}})$<br>$R^2 = 0.47$  |
| LO-OOA3                  | -                                                                              | -                                                                               | $y = 3.81 \cdot \exp(-0.029(\pm 0.014) \cdot t_{\text{photo}})$<br>$R^2 = 0.67$ |
| LO-OOA4                  | -                                                                              | $y = 1.50 \cdot \exp(0.032(\pm 0.007) \cdot t_{\text{photo}})$<br>$R^2 = 0.49$  | $y = 1.82 \cdot \exp(0.029(\pm 0.011) \cdot t_{\text{photo}})$<br>$R^2 = 0.59$  |
| MO-OOA                   | $y = 0.70 \cdot \exp(0.048(\pm 0.021) \cdot t_{\text{photo}})$<br>$R^2 = 0.76$ | $y = 1.25 \cdot \exp(0.064(\pm 0.015) \cdot t_{\text{photo}})$<br>$R^2 = 0.92$  | $y = 1.58 \cdot \exp(0.064(\pm 0.013) \cdot t_{\text{photo}})$<br>$R^2 = 0.93$  |

Table S1 Fitting functions for the different parameters as a function of relative photochemical age.

| $\sigma_{\text{abs BrC},470}$ ( $R^2 = 0.54$ ) |                        |                                 |
|------------------------------------------------|------------------------|---------------------------------|
| HR-AMS PMF factor                              | Regression coefficient | Partial correlation coefficient |
|                                                | $\mathbf{a_i}$         |                                 |
| HOA                                            | 0.49                   | 0.53                            |
| LO-OOA1                                        | -0.06                  | 0.39                            |
| LO-OOA2                                        | 0.03                   | 0.58                            |
| LO-OOA3                                        | 0.49                   | -0.25                           |
| LO-OOA4                                        | 0.34                   | 0.55                            |
| MO-OOA                                         | 0.40                   | 0.86                            |
| Intercept                                      |                        | -0.08                           |

60

**Table S2 Results of multiple linear regression (MLR) between  $\sigma_{\text{abs BrC},470}$  and individual PMF-derived factors including. All the PMF-derived factors are included here.**
